# Supplementary material
Source: PubMed Central journal article supplement (PMC4809937)
Supplement: JCM.03022-15_zjm999094881so3.pdf [file JCM.03022-15_zjm999094881so3.pdf]

**Table A1:** List of all targets queried by microarray and WGS, respectively, sorted by their affiliated functional category. The expressed protein and/or its function are also stated. Targets that are queried by the microarray but not by WGS are highlighted in red. For each target that is present in the WGS typing scheme, the NCBI accession number of the initial allele sequence is given (step one of library creation, Figure 1). These accession numbers mostly correspond to those sequences used for microarray probe design (1).

| Target WGS            | Target Microarray                                 | Functional Category    | Gene Product / Function                     | Initial Reference Sequence (microarray probe design) |
|-----------------------|---------------------------------------------------|------------------------|---------------------------------------------|------------------------------------------------------|
| 23SrRNA               | <i>rrnD1 (S. aureus)</i>                          | Species Identification | 23S ribosomal RNA                           | CP000046.1                                           |
| <i>gapA</i>           | <i>gapA</i>                                       | Species Identification | glyceradehyde 3-phosphate dehydrogenase     | CP000046.1                                           |
| <i>katA</i>           | <i>katA</i>                                       | Species Identification | katalase A                                  | CP000046.1                                           |
| <i>coa</i>            | <i>coa</i>                                        | Species Identification | coagulase                                   | CP000046.1                                           |
| <i>nuc1</i>           | <i>nuc1</i>                                       | Species Identification | nuclease                                    |                                                      |
| excluded              | <i>spa</i>                                        | Species Identification | protein A                                   | CP000046.1                                           |
| <i>sbi</i>            | <i>sbi</i>                                        | Species Identification | IgG-binding protein                         | CP000046.1                                           |
| <i>sarA</i>           | <i>sarA</i>                                       | Regulation             | staphylococcal accessory regulator A        | CP000046.1                                           |
| <i>saeS</i>           | <i>saeS</i>                                       | Regulation             | sensor histidine kinase                     | CP000046.1                                           |
| <i>vraS</i>           | <i>vraS</i>                                       | Regulation             | sensor histidine kinase                     | CP000046.1                                           |
| <i>agrB-I</i>         | <i>agrB-I</i>                                     | Regulation             |                                             | CP000046.1                                           |
| <i>agrB-II</i>        | <i>agrB-II</i>                                    | Regulation             | accessory gene regulator                    | BA000017.4                                           |
| <i>agrB-III</i>       | <i>agrB-III</i>                                   | Regulation             | protein B                                   | BX571856.1                                           |
| <i>agrB-IV</i>        | <i>agrB-IV</i>                                    | Regulation             |                                             | AF288215.1                                           |
| <i>agrC-I</i>         | <i>agrC-I</i>                                     | Regulation             |                                             | CP000046.1                                           |
| <i>agrC-II</i>        | <i>agrC-II</i>                                    | Regulation             | histidine kinase receptor agrC              | BA000017.4                                           |
| <i>agrC-III</i>       | <i>agrC-III</i>                                   | Regulation             |                                             | BX571856.1                                           |
| <i>agrC-IV</i>        | <i>agrC-IV</i>                                    | Regulation             |                                             | AF288215.1                                           |
| <i>agrD-I</i>         | <i>agrD-I</i>                                     | Regulation             |                                             | CP000046.1                                           |
| <i>agrD-II</i>        | <i>agrD-II</i>                                    | Regulation             | autoinducing pheromone agrD                 | BA000017.4                                           |
| <i>agrD-III</i>       | <i>agrD-III</i>                                   | Regulation             |                                             | BX571856.1                                           |
| excluded              | <i>agr-I (total)</i>                              | Regulation             |                                             |                                                      |
| excluded              | <i>agr-II (total)</i>                             | Regulation             |                                             |                                                      |
| excluded              | <i>agr-III (total)</i>                            | Regulation             |                                             |                                                      |
| excluded              | <i>agr-IV (total)</i>                             | Regulation             |                                             |                                                      |
| <i>hld</i>            | <i>hld</i>                                        | Regulation             | delta-hemolysin                             | CP000046.1                                           |
| excluded              | <i>hsdS1 (RF122)</i>                              |                        |                                             |                                                      |
| excluded              | <i>hsdS2</i>                                      |                        |                                             |                                                      |
| excluded              | <i>(Mu50+N315+COL+USA300+NCTC8325)</i>            |                        |                                             |                                                      |
| excluded              | <i>hsdS2 (MW2+MSSA476)</i>                        |                        |                                             |                                                      |
| excluded              | <i>hsdS2 (RF122)</i>                              |                        |                                             |                                                      |
| excluded              | <i>hysA2 (all other than COL+USA300+NCTC8325)</i> |                        |                                             |                                                      |
| excluded              | <i>hsdS2 (MRSA252)</i>                            |                        | restriction endonuclease                    |                                                      |
| excluded              | <i>hsdS3 (all other than RF122+MRSA252)</i>       |                        | subunit S                                   |                                                      |
| excluded              | <i>hsdS3</i>                                      |                        | 3 loci                                      |                                                      |
| excluded              | <i>(COL+USA300+NCTC8325+MW2+MSSA476+RF122)</i>    |                        |                                             |                                                      |
| excluded              | <i>hsdS3 (Mu50+N315)</i>                          |                        |                                             |                                                      |
| excluded              | <i>hsdS3 (CC51+MRSA252)</i>                       |                        |                                             |                                                      |
| excluded              | <i>hsdS3 (MRSA252)</i>                            |                        |                                             |                                                      |
| excluded              | <i>hsdSx (CC25)</i>                               |                        |                                             |                                                      |
| excluded              | <i>hsdSx (CC15)</i>                               |                        |                                             |                                                      |
| excluded              | <i>hsdSx (etd)</i>                                |                        |                                             |                                                      |
| <i>mecA</i>           | <i>mecA</i>                                       | Resistance             | PBP2a                                       | CP000046.1                                           |
| <i>mecI</i>           | <i>mecI</i>                                       | Resistance             | mecA repressor                              | BA000017.4                                           |
| <i>mecR-truncated</i> | <i>delta_mecR</i>                                 | Resistance             | truncated mecR                              | CP000046.1                                           |
| <i>mecR</i>           | <i>mecR</i>                                       | Resistance             | signal-transducer MecR1                     | BA000017.4                                           |
| <i>ugpQ</i>           | <i>ugpQ</i>                                       | Resistance             | glycerophosphoryl diester phosphodiesterase | CP000046.1                                           |
| <i>ccrA-1</i>         | <i>ccrA-1</i>                                     | Resistance             | Chromosomal Cassette Recombinase            | CP000046.1                                           |
| <i>ccrB-1</i>         | <i>ccrB-1</i>                                     | Resistance             | Chromosomal Cassette Recombinase            | BX571857.1                                           |
| <i>ccrA-2</i>         | <i>ccrA-2</i>                                     | Resistance             | Chromosomal Cassette Recombinase            | BA000017.4                                           |

|                  |                                |            |                                                                            |                      |
|------------------|--------------------------------|------------|----------------------------------------------------------------------------|----------------------|
| <i>ccrB-2</i>    | <i>ccrB-2</i>                  | Resistance | Chromosomal Cassette Recombinase                                           | BA000017.4           |
| <i>ccrA-3</i>    | <i>ccrA-3</i>                  | Resistance | Chromosomal Cassette Recombinase                                           | AB014436.1           |
| <i>ccrB-3</i>    | <i>ccrB-3</i>                  | Resistance | Chromosomal Cassette Recombinase                                           | AB014436.1           |
| <i>ccrA-4</i>    | <i>ccrA-4</i>                  | Resistance | Chromosomal Cassette Recombinase                                           | AF411935.3           |
| <i>ccrB-4</i>    | <i>ccrB-4</i>                  | Resistance | Chromosomal Cassette Recombinase                                           | AF411935.3           |
| <i>ccrAA</i>     | <i>ccrAA (MRSAZH47)_probe1</i> | Resistance | Chromosomal Cassette Recombinase                                           | AP006716.1           |
|                  | <i>ccrAA (MRSAZH47)_probe2</i> | Resistance | Chromosomal Cassette Recombinase                                           |                      |
| <i>ccrC</i>      | <i>ccrC (85-2082)</i>          | Resistance | Chromosomal Cassette Recombinase                                           | AP008934.1           |
| <i>pls</i>       | <i>plsSCC (COL)</i>            | Resistance | plasmin-sensitive surface protein                                          | CP000046.1           |
| <b>excluded</b>  | <i>Q9XB68-dcs</i>              | Resistance | unknown                                                                    |                      |
| <i>kdpA</i>      | <i>kdpA-SCC</i>                | Resistance | ATPase Chain A                                                             | BA000017.4           |
| <i>kdpB</i>      | <i>kdpB-SCC</i>                | Resistance | ATPase Chain B                                                             | BA000017.4           |
| <i>kdpC</i>      | <i>kdpC-SCC</i>                | Resistance | ATPase Chain C                                                             | BA000017.4           |
| <i>kdpD</i>      | <i>kdpD-SCC</i>                | Resistance | two component system sensor kinase                                         | BA000017.4           |
| <i>kdpE</i>      | <i>kdpE-SCC</i>                | Resistance | two component system response regulator                                    | BA000017.4           |
| <i>xylR</i>      | <i>xylR</i>                    | Resistance | xylose repressor homolog                                                   | BA000017.4           |
| <i>merA</i>      | <i>merA</i>                    | Resistance | Mercuric reductase                                                         | NC_013352.1          |
| <i>merB</i>      | <i>merB</i>                    | Resistance | Mercuric reductase                                                         | AB179623.1           |
| <i>blaZ</i>      | <i>blaZ</i>                    | Resistance | $\beta$ -lactamase                                                         | BX571856.1           |
| <i>blaI</i>      | <i>blaI</i>                    | Resistance | penicillinase repressor                                                    | BX571856.1           |
| <i>blaR</i>      | <i>blaR</i>                    | Resistance | beta-lactamase regulatory protein                                          | BX571856.1           |
| <i>ermA</i>      | <i>erm(A)</i>                  | Resistance | rRNA methyltransferase                                                     | BA000017.4           |
| <i>ermB</i>      | <i>erm(B)</i>                  | Resistance | rRNA methyltransferase                                                     | EF450709.1           |
| <i>ermC</i>      | <i>erm(C)</i>                  | Resistance | rRNA methyltransferase                                                     | M17990.1             |
| <i>lnuA</i>      | <i>lnu(A)</i>                  | Resistance | lincosaminide nucleotidyltransferase                                       | J03947.1             |
| <i>msrA</i>      | <i>msr(A)</i>                  | Resistance | macrolide resistance                                                       | AB013298.1           |
| <i>mefA</i>      | <i>mef(A)</i>                  | Resistance | macrolide efflux protein                                                   | AY064721.1           |
| <i>mphC</i>      | <i>mph(C)</i>                  | Resistance | macrolide 2'-phosphotransferase                                            | AB013298.1           |
| <i>vatA</i>      | <i>vat(A)</i>                  | Resistance | virginiamycin A (a streptogramin) acetyltransferase                        | AF117258.1           |
| <i>vatB</i>      | <i>vat(B)</i>                  | Resistance | acetyltransferase                                                          | U19459.1             |
| <i>vgaA</i>      | <i>vga(A)</i>                  | Resistance | ATP binding protein VgA                                                    | AF117259.1           |
| <i>vgbA</i>      | <i>vga(A) (BM 3327)</i>        | Resistance |                                                                            | AF186237.2           |
|                  | <i>vgb (A)</i>                 | Resistance | virginiamycin B hydrolase                                                  | M36022.1             |
| <i>aacA-aphD</i> | <i>aacA-aphD</i>               | Resistance | 6'-aminoglycoside N-acetyltransferase/2"-aminoglycoside phosphotransferase | AB096217.1           |
| <i>aadD</i>      | <i>aadD</i>                    | Resistance | kanamycin nucleotidyltransferase                                           | BA000017.4           |
| <i>aphA3</i>     | <i>aphA3</i>                   | Resistance | aminoglycoside 3'-phosphotransferase                                       | CP009681.1           |
| <i>sat</i>       | <i>sat</i>                     | Resistance | Streptothricin acetyltransferase                                           | U51474.1             |
| <i>dfrA</i>      | <i>dfrS1</i>                   | Resistance | dihydrofolate reductase                                                    | AE017171.1           |
| <i>fusB</i>      | <i>far1</i>                    | Resistance | fusidic acid resistance                                                    | AY047358.1           |
| <i>fusC</i>      | <i>fusC (Q6GD50)</i>           | Resistance | fusidic acid resistance                                                    | BX571856.1           |
| <i>mupA</i>      | <i>mupA</i>                    | Resistance | isoleucyl tRNA synthetase                                                  | X75439.1             |
| <i>tetK</i>      | <i>tet(K)</i>                  | Resistance | tetracycline-resistance protein                                            | M16217.1             |
| <i>tetM</i>      | <i>tet(M)</i>                  | Resistance | tetracycline-resistance protein                                            | BA000017.4           |
|                  | <i>cat (total)</i>             | Resistance |                                                                            |                      |
|                  | <i>cat (pC221)</i>             | Resistance |                                                                            |                      |
| <i>cat</i>       | <i>cat (pc223)</i>             | Resistance | chloramphenicol acetyltransferase                                          | M64281.1<br>AF507977 |

|                 |                                           |            |                                      |             |
|-----------------|-------------------------------------------|------------|--------------------------------------|-------------|
|                 | <i>cat</i> (pMC524)                       | Resistance | acetyltransferase                    | AB080798.1  |
|                 | <i>cat</i> (pSBK203R)                     | Resistance |                                      | M58515.1    |
| <i>cfr</i>      | <i>cfr</i>                                | Resistance | florfenicol resistance               | AJ249217.1  |
| <i>fexA</i>     | <i>fexA</i>                               | Resistance | florfenicol-chloramphenicol exporter | AJ549214.1  |
| <i>fosB</i>     | <i>fosB</i>                               | Resistance | fosfomycin resistance                | CP000046.1  |
|                 | <i>fosB</i> (plasmid)                     | Resistance | fosfomycin resistance                | AP006717.1  |
| <i>qacA</i>     | <i>qacA</i>                               | Resistance | multidrug efflux protein             | AF053771.1  |
|                 | <i>qacC</i> (total)                       | Resistance |                                      |             |
|                 | <i>qacC</i> (consensus)                   | Resistance | multidrug efflux protein,            | AB125342.1  |
| <i>qacC</i>     | <i>qacC</i> (equine)                      | Resistance | quaternary ammonium                  | AJ512814.1  |
|                 | <i>qacC</i> (Ssap)                        | Resistance | compounds resistance                 | U81980.1    |
|                 | <i>qacC</i> (SA5)                         | Resistance |                                      | Y16944.1    |
|                 | <i>qacC</i> (ST94)                        | Resistance |                                      |             |
| <i>sdrM</i>     | <i>sdrM</i>                               | Resistance | drug efflux transporter              | CP000046.1  |
| <i>vanA</i>     | <i>vanA</i>                               | Resistance | vancomycin/teicoplanin               | AE017171.1  |
| <i>vanB</i>     | <i>vanB</i>                               | Resistance | resistance                           | AE016830.1  |
| <i>vanZ</i>     | <i>vanZ</i>                               | Resistance |                                      | AE017171.1  |
| <i>lmrP</i>     | <i>lmrP</i> (other than RF122)_probe1     | Resistance | drug transporter                     | CP000046.1  |
|                 | <i>lmrP</i> (other than RF122)_probe2     | Resistance |                                      | AJ938182.1  |
| <i>mprF</i>     | <i>mprF</i> (COL+MW2)                     | Resistance | oxacillin resistance-related         | CP000046.1  |
|                 | <i>mprF</i> (Mu50+MRSA252)                | Resistance | FmtC protein                         |             |
| excluded        | <i>Q2FXC0</i>                             | Resistance | hypothetical protein                 |             |
| excluded        | <i>Q2YUB3</i>                             | Resistance | hypothetical protein                 |             |
| excluded        | <i>Q7A4X2</i>                             | Resistance | hypothetical protein                 |             |
|                 | <i>tst1</i> (consensus)                   | Virulence  |                                      | BA000017.4  |
| <i>tst1</i>     | <i>tst1</i> ("human" allele)              | Virulence  | toxic shock toxin                    | NC_007622.1 |
|                 | <i>tst1</i> ("bovine" allele, from RF122) | Virulence  |                                      |             |
|                 | <i>sea</i>                                | Virulence  | enterotoxin A                        | BA000017.4  |
| <i>sea</i>      | <i>sea</i> (320E)                         | Virulence  | enterotoxin A                        | CP001996.1  |
|                 | <i>sea</i> (N315)                         | Virulence  | enterotoxin A                        | BA000018.3  |
| <i>seb</i>      | <i>seb</i>                                | Virulence  | enterotoxin B                        | CP000046.1  |
| <i>sec</i>      | <i>sec</i>                                | Virulence  | enterotoxin C                        | BA000017.4  |
| <i>sed</i>      | <i>sed</i>                                | Virulence  | enterotoxin D                        | M28521.1    |
| <i>see</i>      | <i>see</i>                                | Virulence  | enterotoxin E                        | M21319.1    |
| <i>seg</i>      | <i>seg</i>                                | Virulence  | enterotoxin G                        | AB016487.1  |
| <i>seh</i>      | <i>seh</i>                                | Virulence  | enterotoxin H                        | AY345144.1  |
| <i>sei</i>      | <i>sei</i>                                | Virulence  | enterotoxin I                        | BA000017.4  |
| <i>sej</i>      | <i>sej</i>                                | Virulence  | enterotoxin J                        | AB075606.1  |
| <i>sek</i>      | <i>sek</i>                                | Virulence  | enterotoxin K                        | CP000046.1  |
| <i>sel</i>      | <i>sel</i>                                | Virulence  | enterotoxin L                        | BA000017.4  |
| <i>sem</i>      | <i>selm</i>                               | Virulence  | enterotoxin-like N                   | BA000017.4  |
|                 | <i>seln</i> (consensus)                   | Virulence  | enterotoxin-like N                   | BA000017.4  |
| <i>sen</i>      | <i>seln</i> (other than RF122)            | Virulence  | enterotoxin-like N                   | AJ938182.1  |
| <i>seo</i>      | <i>selo</i>                               | Virulence  | enterotoxin-like O                   | BA000017.4  |
| <i>seq</i>      | <i>seq</i>                                | Virulence  | enterotoxin Q                        | CP000046.1  |
| <i>ser</i>      | <i>ser</i>                                | Virulence  | enterotoxin R                        | AB075606.1  |
| <i>seu</i>      | <i>selu</i>                               | Virulence  | enterotoxin-like U                   | BA000017.4  |
| excluded        | <i>egc</i> (total)                        | Virulence  |                                      |             |
| <i>ORF CM14</i> | <i>ORF CM14_probe1</i>                    | Virulence  | putative                             | AJ938182.1  |
|                 | <i>ORF CM14_probe2</i>                    | Virulence  | enterotoxin                          |             |
|                 | <i>ssl01/set6_probe1_11</i>               | Virulence  |                                      | CP000046.1  |
|                 | <i>ssl01/set6_probe2_11</i>               | Virulence  |                                      | BX571856.1  |
|                 | <i>ssl01/set6_probe1_12</i>               | Virulence  |                                      | BA000017.4  |
|                 | <i>ssl01/set6_probe2_12</i>               | Virulence  |                                      | BA000033.2  |
|                 | <i>ssl01/set6_probeRF122</i>              | Virulence  |                                      | AJ938182.1  |
| <i>ssl01</i>    | <i>ssl01/set6_probe4_11</i>               | Virulence  | <i>ssl01</i>                         |             |
|                 | <i>ssl01/set6</i> (COL)                   | Virulence  |                                      |             |
|                 | <i>ssl01/set6</i> (Mu50+N315)             | Virulence  |                                      |             |
|                 | <i>ssl01/set6</i> (MW2+MSSA476)           | Virulence  |                                      |             |
|                 | <i>ssl01/set6</i> (MRSA252)               | Virulence  |                                      |             |
|                 | <i>ssl01/set6</i> (RF122)                 | Virulence  |                                      |             |
|                 | <i>ssl01/set6</i> (other alleles)         | Virulence  |                                      |             |
| <i>ssl02</i>    | <i>ssl02/set7</i>                         | Virulence  | <i>ssl02</i>                         | CP000046.1  |
|                 | <i>ssl02/set7</i> (MRSA252)               | Virulence  |                                      | BX571856.1  |
|                 | <i>ssl03/set8_probe 1</i>                 | Virulence  |                                      | CP000046.1  |
| <i>ssl03</i>    | <i>ssl03/set8_probe 2</i>                 | Virulence  | <i>ssl03</i>                         | AJ938182.1  |
|                 | <i>ssl03/set8</i> (MRSA252, SAR0424)      | Virulence  |                                      | BX571856.1  |
|                 | <i>ssl04/set9</i>                         | Virulence  | <i>ssl04</i>                         | CP000046.1  |
| <i>ssl04</i>    | <i>ssl04/set9</i> (MRSA252, SAR025)       | Virulence  |                                      | BX571856.1  |

|                   |                                      |           |                                |            |
|-------------------|--------------------------------------|-----------|--------------------------------|------------|
|                   | <i>ssl05/set3_probe 1</i>            | Virulence |                                | BA000017.4 |
| <i>ssl05</i>      | <i>ssl05/set3 (RF122, probe-611)</i> | Virulence | <i>ssl05</i>                   | AJ938182.1 |
|                   | <i>ssl05/set3 (MRSA252)</i>          | Virulence |                                | BX571856.1 |
|                   | <i>ssl05/set3_probe 2 (612)</i>      | Virulence |                                |            |
| <i>ssl06</i>      | <i>ssl06/set21</i>                   | Virulence | <i>ssl06</i>                   | BX571857.1 |
|                   | <i>ssl06 (NCTC8325+MW2)</i>          | Virulence |                                | BA000033.2 |
|                   | <i>ssl07/set1</i>                    | Virulence |                                | BA000017.4 |
| <i>ssl07</i>      | <i>ssl07/set1 (MRSA252)</i>          | Virulence | <i>ssl07</i>                   | BX571856.1 |
|                   | <i>ssl07/set1 (AF188836)</i>         | Virulence |                                | AF188836   |
| <i>ssl08</i>      | <i>ssl08/set12_probe 1</i>           | Virulence | <i>ssl08</i>                   | BA000017.4 |
|                   | <i>ssl08/set12_probe 2</i>           | Virulence |                                | AJ938182.1 |
| <i>ssl09</i>      | <i>ssl09/set5_probe 1</i>            | Virulence | <i>ssl09</i>                   | CP000046.1 |
|                   | <i>ssl09/set5_probe 2</i>            | Virulence |                                |            |
|                   | <i>ssl09/set5 (MRSA252)</i>          | Virulence |                                | BX571856.1 |
|                   | <i>ssl10/set4</i>                    | Virulence |                                | CP000046.1 |
| <i>ssl10</i>      | <i>ssl10 (RF122)</i>                 | Virulence | <i>ssl10</i>                   | AJ938182.1 |
|                   | <i>ssl10/set4 (MRSA252)</i>          | Virulence |                                | BX571856.1 |
|                   | <i>ssl11/set2 (COL)</i>              | Virulence |                                | CP000046.1 |
| <i>ssl11</i>      | <i>ssl11+set2(Mu50+N315)</i>         | Virulence | <i>ssl11</i>                   | BA000017.4 |
|                   | <i>ssl11+set2(MW2+MSSA476)</i>       | Virulence |                                | BA000033.2 |
|                   | <i>ssl11/set2 (MRSA252)</i>          | Virulence |                                | BX571856.1 |
| <i>setB3</i>      | <i>setB3</i>                         | Virulence | <i>setB3</i>                   | CP000046.1 |
|                   | <i>setB3 (MRSA252)</i>               | Virulence |                                | BX571856.1 |
| <i>setB2</i>      | <i>setB2</i>                         | Virulence | <i>setB2</i>                   | CP000046.1 |
|                   | <i>setB2 (MRSA252)</i>               | Virulence |                                | BX571856.1 |
| <i>setB1</i>      | <i>setB1</i>                         | Virulence | <i>setB1</i>                   | CP000046.1 |
| <i>setC</i>       | <i>setC/selx</i>                     | Virulence | <i>setC</i>                    | CP000046.1 |
| <i>hlgA</i>       | <i>hlgA</i>                          | Virulence |                                | CP000046.1 |
| <i>hlgB</i>       | <i>lukF</i>                          | Virulence |                                | CP000046.1 |
| <i>hlgC</i>       | <i>lukS</i>                          | Virulence | hemolysin gamma                | CP000046.1 |
|                   | <i>lukS (ST22+ST45)</i>              | Virulence |                                | EF672356.1 |
| <i>lukF-PV</i>    | <i>lukF-PV</i>                       | Virulence | Panton-Valentine               | AB006796.1 |
| <i>lukS-PV</i>    | <i>lukS-PV</i>                       | Virulence | leukocidin                     | AB006796.1 |
| <i>lukF-PV83</i>  | <i>lukF-PV (P83)</i>                 | Virulence | leukocidin                     | AB044554.1 |
| <i>lukM</i>       | <i>lukM</i>                          | Virulence |                                | AB044554.1 |
| <i>lukD</i>       | <i>lukD</i>                          | Virulence | leukocidin D                   | CP000046.1 |
| <i>lukE</i>       | <i>lukE</i>                          | Virulence | leukocidin E                   | CP000046.1 |
| <i>lukX</i>       | <i>lukX</i>                          | Virulence | putative leukocidin            | CP000046.1 |
| <i>lukY</i>       | <i>lukY</i>                          | Virulence | putative                       | CP000046.1 |
|                   | <i>lukY (ST30+ST45)</i>              | Virulence | leukocidin                     | BX571856.1 |
| <i>hl</i>         | <i>hl</i>                            | Virulence | putative hemolysin             | CP000046.1 |
| <i>hla</i>        | <i>hla</i>                           | Virulence | alpha-hemolysin                | CP000046.1 |
| <i>hlIII</i>      | <i>hlIII (consensus)</i>             | Virulence | hemolysin III                  | CP000046.1 |
|                   | <i>hlIII (other than RF122)</i>      | Virulence |                                | AJ938182.1 |
|                   | <i>hlb_probe 1</i>                   | Virulence |                                |            |
| <b>excluded</b>   | <i>hlb_probe 2</i>                   | Virulence | beta hemolysin                 |            |
|                   | <i>hlb_probe 3</i>                   | Virulence |                                |            |
| <i>hlb-intact</i> | <i>un-disrupted hlb</i>              | Virulence |                                | CP000046.1 |
| <i>sak</i>        | <i>sak</i>                           | Virulence | staphylokinase                 | BA000017.4 |
| <i>chp</i>        | <i>chp</i>                           | Virulence | chemotaxis inhibitory protein  |            |
|                   |                                      |           | CHIPS                          | BX571856.1 |
| <i>scn</i>        | <i>scn</i>                           | Virulence | staphylococcal complement      |            |
|                   |                                      |           | inhibitor SCIN                 | BA000017.4 |
| <i>etA</i>        | <i>etA</i>                           | Virulence | serine protease /              | AP001553.1 |
| <i>etB</i>        | <i>etB</i>                           | Virulence | exfoliative toxin              | AP003088.1 |
| <i>etD</i>        | <i>etD</i>                           | Virulence |                                | AB057421.1 |
| <i>edinA</i>      | <i>edinA</i>                         | Virulence |                                | M63917.1   |
| <i>edinB</i>      | <i>edinB</i>                         | Virulence | epidermal cell differentiation |            |
| <i>edinC</i>      | <i>edinC</i>                         | Virulence | inhibitor                      | AB057421.1 |
| <b>excluded</b>   | <i>ACME (total)</i>                  | Virulence |                                | AP003088.1 |
| <i>arcA</i>       | <i>arcA-SCC</i>                      | Virulence | arginine deiminase             | AE015929.1 |
| <i>arcB</i>       | <i>arcB-SCC</i>                      | Virulence | ornithine                      | AE015929.1 |
| <i>arcC</i>       | <i>arcC-SCC</i>                      | Virulence | carbamoyltransferase           |            |
| <i>arcD</i>       | <i>arcD-SCC</i>                      | Virulence | carbamate kinase               | AE015929.1 |
|                   |                                      |           | arginine/ornithine             | AE015929.1 |
|                   |                                      |           | antiporter                     |            |
| <i>aur</i>        | <i>aur (consensus)</i>               | Virulence |                                | CP000046.1 |
|                   | <i>aur (other than MRSA252)</i>      | Virulence | aureolysin                     |            |
|                   | <i>aur (MRSA252)</i>                 | Virulence |                                | BX571856.1 |
| <i>splA</i>       | <i>splA</i>                          | Virulence | serine protease SplA           | CP000046.1 |

|                 |                                                        |           |                                                |            |
|-----------------|--------------------------------------------------------|-----------|------------------------------------------------|------------|
| <i>splB</i>     | <i>splB</i>                                            | Virulence | serine protease SplB                           | CP000046.1 |
| <i>splE</i>     | <i>splE</i>                                            | Virulence | serine protease SplE                           | CP000046.1 |
| <i>sspA</i>     | <i>sspA</i>                                            | Virulence | glutamyl endopeptidase                         | CP000046.1 |
| <i>sspB</i>     | <i>sspB</i>                                            | Virulence | staphopain B                                   | CP000046.1 |
| <i>sspP</i>     | <i>sspP (consensus)</i>                                | Virulence | staphopain A                                   | CP000046.1 |
| <b>excluded</b> | <i>sspP (other than ST93)</i>                          | Virulence |                                                |            |
| <i>cap1H</i>    | <i>cap1 (total)</i>                                    | Virulence |                                                |            |
| <i>cap1J</i>    | <i>capH1</i>                                           | Virulence | capsular polysaccharide synthesis enzyme 1     | U10927.2   |
| <i>cap1K</i>    | <i>capJ1</i>                                           | Virulence |                                                | U10927.2   |
| <b>excluded</b> | <i>capK1</i>                                           | Virulence |                                                | U10927.2   |
| <i>cap5H</i>    | <i>cap 5 (total)</i>                                   | Virulence |                                                |            |
| <i>cap5J</i>    | <i>capH5</i>                                           | Virulence | capsular polysaccharide synthesis enzyme 5     | CP000046.1 |
| <i>cap5K</i>    | <i>capJ5</i>                                           | Virulence |                                                | CP000046.1 |
| <b>excluded</b> | <i>capK5</i>                                           | Virulence |                                                | CP000046.1 |
| <i>cap8H</i>    | <i>cap 8 (total)</i>                                   | Virulence |                                                |            |
| <i>cap8I</i>    | <i>capH8</i>                                           | Virulence | capsular polysaccharide synthesis enzyme 8     | BX571856.1 |
| <i>cap8J</i>    | <i>capI8</i>                                           | Virulence |                                                | BX571856.1 |
| <i>cap8K</i>    | <i>capJ8</i>                                           | Virulence |                                                | BX571856.1 |
|                 | <i>capK8</i>                                           | Virulence |                                                | BX571856.1 |
| <i>icaA</i>     | <i>icaA</i>                                            | Virulence | intercellular adhesion protein A               | CP000046.1 |
| <i>icaC</i>     | <i>icaC</i>                                            | Virulence | intercellular adhesion protein C               | CP000046.1 |
| <i>icaD</i>     | <i>icaD</i>                                            | Virulence | intercellular adhesion protein D               | CP000046.1 |
|                 | <i>hysA1 (MRSA252)</i>                                 | Virulence |                                                | BX571856.1 |
|                 | <i>hysA1 (MRSA252+RF122) and/or hysA2 (consensus)</i>  | Virulence |                                                | CP000046.1 |
| <i>hysA</i>     | <i>hysA1 (MRSA252+RF122) and/or hysA2 (COL+USA300)</i> | Virulence | hyaluronate lyase                              |            |
|                 | <i>hysA2 (all other than MRSA252)</i>                  | Virulence |                                                |            |
|                 | <i>hysA2 (COL+USA300+NCTC8325)_probe1</i>              | Virulence |                                                |            |
|                 | <i>hysA2 (MRSA252)</i>                                 | Virulence |                                                |            |
| <i>bap</i>      | <i>bap</i>                                             | Virulence | biofilm-associated surface protein             | AY220730.1 |
| <i>fib</i>      | <i>fib</i>                                             | Virulence | fibrinogen-binding protein                     | CP000046.1 |
|                 | <i>fib (MRSA252)</i>                                   | Virulence |                                                | BX571856.1 |
| <i>ebh</i>      | <i>ebh (consensus)</i>                                 | Virulence | extracellular matrix-binding protein homologue | CP000046.1 |
| <i>eno</i>      | <i>eno</i>                                             | Virulence | Enolase                                        | CP000046.1 |
|                 | <i>ebpS (total)</i>                                    | Virulence |                                                | CP000046.1 |
| <i>ebpS</i>     | <i>ebpS_probe 612</i>                                  | Virulence |                                                |            |
|                 | <i>ebpS_probe 614</i>                                  | Virulence | elastin-binding protein                        |            |
|                 | <i>ebpS (01-1111)</i>                                  | Virulence |                                                |            |
|                 | <i>ebpS (COL)</i>                                      | Virulence |                                                |            |
|                 | <i>vwB (total)</i>                                     | Virulence |                                                | CP000046.1 |
|                 | <i>vwB (consensus)</i>                                 | Virulence |                                                | BA000017.4 |
| <i>vwB</i>      | <i>vwB (COL+MW2)</i>                                   | Virulence | von Willebrand factor-binding protein          | AJ938182.1 |
|                 | <i>vwB (MRSA252)</i>                                   | Virulence |                                                |            |
|                 | <i>vwB (Mu50)</i>                                      | Virulence |                                                |            |
|                 | <i>vwB (RF122)</i>                                     | Virulence |                                                |            |
|                 | <i>map (total)</i>                                     | Virulence | extracellular adhesive protein                 | CP000046.1 |
| <i>map</i>      | <i>map (COL)</i>                                       | Virulence | //                                             | BX571856.1 |
|                 | <i>map (MRSA252)</i>                                   | Virulence | MHC class II analogous protein                 | BA000017.4 |
|                 | <i>map (Mu50+MW2)</i>                                  | Virulence |                                                |            |
| <i>cna</i>      | <i>cna</i>                                             | Virulence | collagen binding adhesin                       | BX571856.1 |
|                 | <i>fnbA (total)</i>                                    | Virulence |                                                | NC_002951  |
|                 | <i>fnbA (consensus)</i>                                | Virulence |                                                | NC_002952  |
| <i>fnbA</i>     | <i>fnbA (COL)</i>                                      | Virulence | fibronectin-binding protein A                  | NC_003923  |
|                 | <i>fnbA (MRSA252)</i>                                  | Virulence |                                                | NC_007622  |
|                 | <i>fnbA (Mu50+MW2)</i>                                 | Virulence |                                                |            |
|                 | <i>fnbA (RF122)</i>                                    | Virulence |                                                |            |
|                 | <i>fnbB (total)</i>                                    | Virulence |                                                | NC_002951  |
|                 | <i>fnbB (COL)</i>                                      | Virulence |                                                | NC_002758  |
|                 | <i>fnbB (COL+Mu50+MW2)</i>                             | Virulence |                                                | NC_003923  |
| <i>fnbB</i>     | <i>fnbB (Mu50)</i>                                     | Virulence | fibronectin-binding protein B                  | NC_002953  |
|                 | <i>fnbB (MW2)</i>                                      | Virulence |                                                | NC_016928  |
|                 | <i>fnbB (ST15)</i>                                     | Virulence |                                                |            |

|                       |                                        |            |                                                                |            |  |
|-----------------------|----------------------------------------|------------|----------------------------------------------------------------|------------|--|
|                       | <i>fnbB (ST45-2)</i>                   | Virulence  |                                                                |            |  |
|                       | <i>sasG (total)</i>                    | Virulence  |                                                                |            |  |
| <i>sasG</i>           | <i>sasG (COL+Mu50)</i>                 | Virulence  | <i>S. aureus</i> surface protein G                             | CP000046.1 |  |
|                       | <i>sasG (MW2)</i>                      | Virulence  |                                                                | NC_003923  |  |
|                       | <i>sasG (other than MRSA252+RF122)</i> | Virulence  |                                                                |            |  |
| <i>clfA</i>           | <i>clfA (total)</i>                    | Virulence  | Clumping factor A                                              | NC_002951  |  |
|                       | <i>clfA (consensus)</i>                | Virulence  |                                                                | NC_002952  |  |
|                       | <i>clfA (COL+RF122)</i>                | Virulence  |                                                                | NC_003923  |  |
|                       | <i>clfA (MRSA252)</i>                  | Virulence  |                                                                |            |  |
|                       | <i>clfA (Mu50+MW2)</i>                 | Virulence  |                                                                |            |  |
| <i>clfB</i>           | <i>clfB (total)</i>                    | Virulence  | Clumping factor B                                              | NC_002951  |  |
|                       | <i>clfB (consensus)</i>                | Virulence  |                                                                | NC_003923  |  |
|                       | <i>clfB (COL+Mu50)</i>                 | Virulence  |                                                                | NC_007622  |  |
|                       | <i>clfB (MW2)</i>                      | Virulence  |                                                                |            |  |
|                       | <i>clfB (RF122)</i>                    | Virulence  |                                                                |            |  |
| <i>sdrC</i>           | <i>sdrC (total)</i>                    | Virulence  | SD-repeats-protein C<br>(Serine-Aspartic acid)                 | NC_002951  |  |
|                       | <i>sdrC (consensus)</i>                | Virulence  |                                                                | NC_003923  |  |
|                       | <i>sdrC (B1)</i>                       | Virulence  |                                                                | NC_002952  |  |
|                       | <i>sdrC (COL)</i>                      | Virulence  |                                                                |            |  |
|                       | <i>sdrC (Mu50)</i>                     | Virulence  |                                                                |            |  |
|                       | <i>sdrC (MW2+MRSA252+RF122)</i>        | Virulence  |                                                                |            |  |
|                       | <i>sdrC (other than MRSA252+RF122)</i> | Virulence  |                                                                |            |  |
| <i>sdrD</i>           | <i>sdrD (total)</i>                    | Virulence  | SD-repeats-protein D<br>(Serine-Aspartic acid)                 | NC_002951  |  |
|                       | <i>sdrD (consensus)</i>                | Virulence  |                                                                | NC_002758  |  |
|                       | <i>sdrD (COL+MW2)</i>                  | Virulence  |                                                                |            |  |
|                       | <i>sdrD (Mu50)</i>                     | Virulence  |                                                                |            |  |
|                       | <i>sdrD (other)</i>                    | Virulence  |                                                                |            |  |
| <i>sdrE</i>           | <i>bbp (total)</i>                     | Virulence  | SD-repeats-protein E /<br>bone sialoprotein-binding<br>protein | NC_002951  |  |
|                       | <i>bbp (consensus)</i>                 | Virulence  |                                                                | NC_002758  |  |
|                       | <i>bbp (COL+MW2)</i>                   | Virulence  |                                                                |            |  |
|                       | <i>bbp (MRSA252)</i>                   | Virulence  |                                                                |            |  |
|                       | <i>bbp (Mu50)</i>                      | Virulence  |                                                                |            |  |
| <i>isaB</i>           | <i>isaB (RF122)</i>                    | Virulence  |                                                                |            |  |
|                       | <i>isaB (ST45)</i>                     | Virulence  |                                                                |            |  |
|                       | <i>isaB</i>                            | Virulence  | immunodominant antigen B                                       | CP000046.1 |  |
| <i>isaB (MRSA252)</i> | Virulence                              | BX571856.1 |                                                                |            |  |
| <i>isdA</i>           | <i>isdA (consensus)</i>                | Virulence  | iron-regulated<br>surface protein A                            | CP000046.1 |  |
|                       | <i>isdA (MRSA252)</i>                  | Virulence  |                                                                | BX571856.1 |  |
|                       | <i>isdA (other than MRSA252)</i>       | Virulence  |                                                                |            |  |

## References

1. Monecke S, Coombs G, Shore AC, Coleman DC, Akpaka P, Borg M, Chow H, Ip M, Jatzwauk L, Jonas D, Kadlec K, Kearns A, Laurent F, O'Brien FG, Pearson J, Ruppelt A, Schwarz S, Scicluna E, Slickers P, Tan HL, Weber S, Ehrlich R. 2011. A field guide to pandemic, epidemic and sporadic clones of methicillin-resistant *Staphylococcus aureus*. PLoS One 6:e17936.
