# Supplementary material
Source: PubMed Central journal article supplement (PMC4809937)
Supplement: JCM.03022-15_zjm999094881so4.pdf [file JCM.03022-15_zjm999094881so4.pdf]

**Table A2:** List of *S. aureus* reference genomes used for evaluation and extension of the *in silico* typing scheme. Table **A)** depicts all NCBI RefSeq genomes available on Dec 18th, 2014, which were used to establish the allele libraries. Table **B)** depicts the representative genomes of diverse MLST ST that were used to extend the allele libraries.

| A)  |                |               |                                                           |               |      | B)                         |           |
|-----|----------------|---------------|-----------------------------------------------------------|---------------|------|----------------------------|-----------|
| No. | Strain         | Accession Nr. | Characteristics (according to GenBank entry)              | PMID          | ST   | ENA Accession Nr.          | ST        |
| 1   | N315           | NC_002745     | human MRSA                                                | 11418146      | 5    | ERR033388                  | 12        |
| 2   | Mu50           | NC_002758     | human MRSA                                                | 11418146      | 5    | ERR114897                  | 121       |
| 3   | COL            | NC_002951     | early human MRSA                                          | 15774886      | 250  | ERR211639                  | 130       |
| 4   | MRSA252        | NC_002952     | hospital-acquired EMRSA-16 MRSA, gen. diverse             | 15213324      | 36   | ERR211687                  | 133       |
| 5   | MSSA476        | NC_002953     | invasive, community-acquired, susceptible                 | 15213324      | 1    | ERR084616                  | 151       |
| 6   | MW2            | NC_003923     | CA-MRSA, highly virulent                                  | 12044378      | 1    | ERR172063                  | 20        |
| 7   | RF122          | NC_007622     | bovine mastitis, Ireland                                  | 17971880      | 151  | ERR072252                  | 22        |
| 8   | USA300_FPR3757 | NC_007793     | CA-MRSA, virulent (USA300), ACME                          | 16517273      | 8    | SRR016396                  | 30        |
| 9   | NCTC8325       | NC_007795     | early MSSA                                                | vgl. 16559089 | 8    | SRR445031                  | 398       |
| 10  | JH9            | NC_009487     | vancomycin resistant MRSA, evolved isolate                | 14645269      | 105  | ERR108050                  | 45        |
| 11  | JH1            | NC_009632     | vancomycin susceptible MRSA, parental isolate             | 14645269      | 105  | ERR086060                  | 5         |
| 12  | Newman         | NC_009641     | MSSA, human infection, < virulence than MW2               | 17951380      | 254  | ERR204157                  | 59        |
| 13  | Mu3            | NC_009782     | variable vancomycin-resistance, MRSA, pneumonia, Japan    | 9400512       | 5    | ERR109588                  | 7         |
| 14  | USA300_TCH1516 | NC_010079     | MRSA, virulent (USA300), pediatric                        | 17986343      | 8    | ERR111110                  | 80        |
| 15  | ED98           | NC_013450     | chicken pathogen, MSSA??                                  | 19884497      | 5    | ERR048356                  | 239       |
| 16  | VC40           | NC_016912     | vancomycin- and daptomycin-resistant MRSA                 | 22461548      | 8    | ERR070041                  | 1         |
| 17  | M013           | NC_016928     | CA-MRSA, pvl-Positive, ST59-SCCmec V, pus/wound, Taiwan   | 22328755      | 59   | ERR127444                  | 15        |
| 18* | MSHR1132       | NC_016941     | early-branching, CC75, small access. genome, Australia    | 21813488      | 1850 | ERR175883                  | 97        |
| 19  | TW20           | NC_017331     | highly transmissible, MRSA, MDR, antiseptics-res., ST239  | 19948800      | 239  | ERR212215                  | 247       |
| 20  | ST398          | NC_017333     | livestock-acquired MRSA (pigs, calves)                    | 20546576      | 398  | ERR234846                  | 25        |
| 21  | ED133          | NC_017337     | ruminant (Wiederkäuer) pathogen                           | 20624747      | 133  | ERR246635                  | 352       |
| 22  | JKD6159        | NC_017338     | Australian CA-MRSA                                        | 20729356      | 93   | SRR016154                  | 8         |
| 23  | 04-02981       | NC_017340     | human MRSA, European clone, ST225                         | 20386717      | 225  | ERR033380                  | 101       |
| 24  | JKD6008        | NC_017341     | human MRSA, ST239, interm. vancomycin res., New Zealand   | 20802046      | 239  | ERR127412                  | 88        |
| 25  | TCH60          | NC_017342     | human MRSA                                                | Unpublished   | 30   | <b>NCBI GenBank</b>        | <b>ST</b> |
| 26  | ECT-R2         | NC_017343     | MR-MRSA, human wound, Sweden, SCCmec remnant              | 21590357      | 5    | CP010941.1, strain SA17_S6 | 152       |
| 27  | T0131          | NC_017347     | human ST239-MRSA-SCCmec Type III, China                   | 21551295      | 239  |                            |           |
| 28  | LGA251         | NC_017349     | human and bovine, type-XI SCCmec, prevalent in Europe     | 21641281      | 425  |                            |           |
| 29  | 11819-97       | NC_017351     | European CA-MRSA, ST80-IV                                 | 22374956      | 80   |                            |           |
| 30  | 71193          | NC_017673     | animal-independent ST398 MSSA                             | 22375071      | 398  |                            |           |
| 31  | HO 5096 0412   | NC_017763     | EMRSA15, neonatal outbreak                                | 23299977      | 22   |                            |           |
| 32  | 08BA02176      | NC_018608     | LA-MRSA, ST398, Canada                                    | 23144384      | 398  |                            |           |
| 33  | ST228-01       | NC_020529     | South German Clone ST228-MRSA-I                           | 22720005      | 228  |                            |           |
| 34  | ST228-02       | NC_020532     |                                                           | 22720005      | 228  |                            |           |
| 35  | ST228-03       | NC_020533     |                                                           | 22720005      | 228  |                            |           |
| 36  | ST228-04       | NC_020536     | - microevolution study -                                  | 22720005      | 228  |                            |           |
| 37  | ST228-05       | NC_020537     | hospital in Lausanne, Switzerland                         | 22720005      | 228  |                            |           |
| 38  | ST228-06       | NC_020564     | 2001 - 2008                                               | 22720005      | 228  |                            |           |
| 39  | ST228-07       | NC_020566     |                                                           | 22720005      | 228  |                            |           |
| 40  | ST228-08       | NC_020568     |                                                           | 22720005      | 228  |                            |           |
| 41  | M1             | NC_021059     | MRSA, t024-ST8-IVa, Denmark                               | 23792746      | 8    |                            |           |
| 42  | CA-347         | NC_021554     | MRSA (USA600), CC45, nasal colonisation / sepsis          | 23887918      | 45   |                            |           |
| 43  | Bmb9393        | NC_021670.1   | human MRSA, biofilm formation, ST239, prevalent in Brazil | 23929475      | 239  |                            |           |
| 44  | 55/2053        | NC_022113.1   | none                                                      | Unpublished   | 30   |                            |           |
| 45  | CN1            | NC_022226.1   | CA-MRSA, PVL-negative, ST72, Korea                        | 23977354      | 72   |                            |           |
| 46  | SA957          | NC_022442.1   | CA-MRSA, ST59, "Taiwan Clone", PVL-positive, virulent     | 24039691      | 59   |                            |           |
| 47  | SA40           | NC_022443.1   | CA-MRSA, ST59, "Asian-Pacific Clone", colonizer           | 24039691      | 59   |                            |           |
| 48  | Z172           | NC_022604     | HA-MRSA, ST239-SCCmec type III, interm.-VRSA, Taiwan      | 24309740      | 239  |                            |           |

excluded for typing comparison - high similarity to ST228-01

\* The alleles of strain MSHR 1132 were retroactively excluded from the allele libraries due to high diversity to other alleles
